# Supplementary material
Source: HighWire-hosted journal article supplement (https://bmjopen.bmj.com/content/14/12/e080102)
Supplement: inline-supplementary-material-1 [file inline-supplementary-material-1.pdf]

## SUPPLEMENTAL MATERIALS

### APPENDIX TABLES

App-Table 1: Modified Westley croup score

App-Table 2: TOP (Telephone Out Patient) Score

App-Table 3: Severity of croup at presentation to ED (for children with complete data available)

App-Table 4: Percentage of children with barking cough, stridor, and indrawing, and TOP score by day of follow up in prospective sample from pediatric and general EDs

App-Table 5: Timing of peak symptoms measured by maximum TOP score at pediatric (n=303) and general (n=1214) EDs

App-Table 6: Stress level reported by caregiver by day of follow up in children from pediatric and general EDs

**App-Table 1: Modified Westley croup score(10)**

| Clinical sign                                                                          |                | Points |
|----------------------------------------------------------------------------------------|----------------|--------|
| Stridor                                                                                | None           | 0      |
|                                                                                        | With agitation | 1      |
|                                                                                        | At rest        | 2      |
| Indrawing                                                                              | None           | 0      |
|                                                                                        | Mild           | 1      |
|                                                                                        | Moderate       | 2      |
|                                                                                        | Severe         | 3      |
| <b>Total score (range is 0 to 5 points) =</b>                                          |                |        |
| Mild croup = 0 to 1 point<br>Moderate croup = 2 to 4 points<br>Severe croup = 5 points |                |        |

**App-Table 2: TOP (Telephone Out Patient) Score<sup>(7)</sup>**

| Clinical Status Question                                                                               | Response                            | Score | Total Additive Score |
|--------------------------------------------------------------------------------------------------------|-------------------------------------|-------|----------------------|
| <b>For stridor:</b><br>"In the past 24 hours, when your child breathed in did he or she make a noise?" | No                                  | 0     | 0                    |
|                                                                                                        | Yes, when upset, active or agitated | 1     | 1                    |
|                                                                                                        | Yes, when at rest or quiet          | 1     | 2                    |
| <b>For cough:</b><br>"In the past 24 hours, has your child had a cough?"                               | No (questionnaire complete)         | 0     | 0                    |
|                                                                                                        | Yes (go to next question)           |       |                      |
| <b>For quality of cough:</b><br>"Was the cough a barking cough or not?"                                | Not barking                         | 0     | 0                    |
|                                                                                                        | Barking                             | 1     | 3                    |
| <b>Total score (range 0 to 3 points) =</b>                                                             |                                     |       |                      |

**App-Table 3: Severity of croup at presentation to ED (for children with complete data available)**

|                       | <b>Pediatric ED</b><br><b>All children evaluated with croup n=814</b> |                                    |                                 | <b>26 General EDs</b><br><b>All children evaluated with croup (Total n=unknown)</b> |                                     |                                                    |                                  |                                  |
|-----------------------|-----------------------------------------------------------------------|------------------------------------|---------------------------------|-------------------------------------------------------------------------------------|-------------------------------------|----------------------------------------------------|----------------------------------|----------------------------------|
| <b>Croup severity</b> | All retrospective<br>n=776<br>(%)                                     | Only retrospective<br>n=469<br>(%) | All prospective<br>n=307<br>(%) | All retrospective<br>n=4739<br>(%)                                                  | Only retrospective<br>n=4229<br>(%) | Both retrospective and prospective<br>n=510<br>(%) | Only prospective<br>n=704<br>(%) | All prospective<br>n=1214<br>(%) |
| <b>Mild</b>           | 316<br>(40.7)                                                         | 213<br>(45.4)                      | 103<br>(33.6)                   | 905<br>(54.7)                                                                       | 607<br>(51.7)                       | 298<br>(61.8)                                      | 442<br>(66.6)                    | 740<br>(64.6)                    |
| <b>Moderate</b>       | 422<br>(54.4)                                                         | 229<br>(48.8)                      | 193<br>(62.9)                   | 723<br>(43.7)                                                                       | 546<br>(46.5)                       | 177<br>(36.7)                                      | 212<br>(31.9)                    | 389<br>(33.9)                    |
| <b>Severe</b>         | 38<br>(4.9)                                                           | 27<br>(5.8)                        | 11<br>(3.6)                     | 28<br>(1.7)                                                                         | 21<br>(1.8)                         | 7<br>(1.5)                                         | 10<br>(1.5)                      | 17<br>(1.5)                      |
| <b>Missing data</b>   | 0                                                                     | 0                                  | 0                               | 3083<br>(65.1)                                                                      | 3055<br>(72.2)                      | 28<br>(5.5)                                        | 40<br>(5.7)                      | 68<br>(5.6)                      |

**App-Table 4: Percentage of children with barks cough, stridor, and indrawing, and TOP score(7) by day of follow up in prospective sample from pediatric and general EDs**

|                     | Day 1                      |                             | Day 2      |            | Day 3      |            | Day 4      |            | Day 5      |             |
|---------------------|----------------------------|-----------------------------|------------|------------|------------|------------|------------|------------|------------|-------------|
|                     | Ped n/303 <sup>a</sup> (%) | Gen n/1084 <sup>b</sup> (%) | Ped n (%)  | Gen n (%)  | Ped n (%)  | Gen n (%)  | Ped n (%)  | Gen n (%)  | Ped n (%)  | Gen n (%)   |
| <b>Barks cough</b>  | 136 (44.9)                 |                             | 90 (29.7)  |            | 35 (11.6)  |            | 15 (5.0)   |            | 3 (1.0)    |             |
| <b>Stridor</b>      | 79 (26.1)                  |                             | 56 (18.5)  |            | 12 (4.0)   |            | 6 (2.0)    |            | 0 (0)      |             |
| <b>Indrawing</b>    | 19 (6.3)                   |                             | 14 (4.6)   |            | 2 (0.7)    |            | 0 (0)      |            | 0 (0)      |             |
| <b>Data missing</b> | 4 (1.3)                    |                             | 4 (1.3)    |            | 4 (1.3)    |            | 4 (1.3)    |            | 4 (1.3)    |             |
| <b>TOP score 0</b>  | 166 (54.8)                 | 445 (41.1)                  | 211 (69.6) | 708 (65.3) | 268 (88.5) | 907 (83.7) | 288 (95.1) | 999 (92.2) | 300 (99.0) | 1041 (96.0) |
| <b>TOP score 1</b>  | 117 (38.6)                 | 310 (28.6)                  | 70 (23.1)  | 227 (20.9) | 35 (11.6)  | 124 (11.4) | 14 (4.6)   | 62 (5.7)   | 3 (1.0)    | 29 (2.7)    |
| <b>TOP score 2</b>  | 1 (0.3)                    | 163 (15.0)                  | 2 (0.7)    | 86 (7.9)   | 0          | 30 (2.8)   | 0          | 12 (1.1)   | 0          | 9 (0.8)     |
| <b>TOP score 3</b>  | 19 (6.3)                   | 166 (15.3)                  | 20 (6.56)  | 63 (5.8)   | 0          | 23 (2.1)   | 1 (0.3)    | 11 (1.0)   | 0          | 5 (0.5)     |

Ped = pediatric emergency department

Gen = general emergency departments

<sup>a</sup>data available for 303 of the 307 subjects (4 subjects had missing data)<sup>b</sup>Individual score components (barks cough, stridor, indrawing) were not available for the n=1246 dataset. Only overall TOP scores were available for 1084 subjects in the n=1246 dataset

App-Table 5: Timing of peak symptoms measured by maximum TOP score(7) at pediatric (n=303) and general (n=1214) EDs

|          | Reached maximum TOP score |                        | Any ties  |            | Tie on day 1 |            | Tie on day 2 |            | Tie on day 3 |           |
|----------|---------------------------|------------------------|-----------|------------|--------------|------------|--------------|------------|--------------|-----------|
|          | Ped n (%) <sup>a</sup>    | Gen n (%) <sup>b</sup> | Ped n (%) | Gen n (%)  | Ped n (%)    | Gen n (%)  | Ped n (%)    | Gen n (%)  | Ped n (%)    | Gen n (%) |
| On day 0 | 290 (95.7)                | 816 (77.3)             | 47 (16.2) | 258 (31.6) | 35 (12.1)    | 249 (30.5) | 10 (28.6)    | 113 (45.4) | 3 (30.0)     | 33 (29.2) |
| On day 1 | 7 (2.3)                   | 217 (20.6)             | 3 (42.9)  | 65 (30.0)  |              |            | 3 (42.9)     | 65 (30.0)  | 0            | 20 (30.8) |
| On day 2 | 6 (2.0)                   | 17 (1.6)               | N/A       | 3 (17.7)   |              |            |              |            | 0            | 3 (17.6)  |
| On day 3 | 0 (0)                     | 5 (0.5)                | N/A       | 1 (20)     |              |            |              |            |              |           |

Ped = pediatric emergency department  
Gen = general emergency departments  
<sup>a</sup>of the 311 subjects, data available for 307  
<sup>b</sup>of the 1214 subjects, data available for 1084

App-Table 6: Stress level reported by caregiver by day of follow up in children from pediatric and general EDs

| Care-giver reported stress level | Day 1<br>n (%) |               | Day 2<br>n (%) |               | Day 3<br>n (%) |               | Day 4<br>n (%) |               | Day 5<br>n (%) |                |
|----------------------------------|----------------|---------------|----------------|---------------|----------------|---------------|----------------|---------------|----------------|----------------|
|                                  | Ped            | Gen            |
| Calm                             | 92<br>(32.5)   | 298<br>(26.9) | 149<br>(66.8)  | 115<br>(14.6) | 104<br>(78.8)  | 48<br>(10.5)  | 44<br>(81.5)   | 21<br>(9.3)   | 22<br>(78.6)   | 13<br>(12.2)   |
| Coping                           | 52<br>(18.4)   | 213<br>(19.2) | 20<br>(9.0)    | 173<br>(21.9) | 16<br>(12.1)   | 92<br>(20.0)  | 9<br>(16.7)    | 42<br>(18.5)  | 5<br>(17.9)    | 20<br>(18.7)   |
| Stressed                         | 139<br>(49.1)  | 599<br>(54.0) | 54<br>(24.2)   | 502<br>(63.5) | 12<br>(9.1)    | 319<br>(69.5) | 1<br>(1.9)     | 164<br>(72.3) | 1<br>(3.6)     | 74<br>(69.2)   |
| Data missing                     | 24<br>(7.8)    | 104<br>(8.6)  | 84<br>(27.4)   | 424<br>(34.9) | 175<br>(57.0)  | 755<br>(62.2) | 253<br>(82.4)  | 987<br>(81.3) | 279<br>(90.9)  | 1107<br>(91.2) |

Ped = pediatric emergency department (n=307)  
Gen = general emergency departments (n=1214)
